# Supplementary material for: Electron microscopy analysis of ATP-independent nucleosome unfolding by FACT
Source: PubMed Central journal article supplement (PMC8748794; doi:10.1038/s42003-021-02948-8), 2022-01-10
Supplement: 42003_2021_2948_MOESM2_ESM.pdf [file 42003_2021_2948_MOESM2_ESM.pdf]

## Description of Additional Supplementary Files

**File name:** Supplementary Movie 1

**Description:** Flexibility of yFACT complex based on 2D classes of EM samples.

**File name:** Supplementary Movie 2

**Description:** Flexibility of yFACT:Nhp6 complex based on 2D classes of EM samples.

**File name:** Supplementary Data 1

**Description:** Quantitation of particles identified as closed ( $\leq 90^\circ$ ) or open ( $> 90^\circ$ ) in samples with and without Nhp6.

**File name:** Supplementary Data 2

**Description:** Raw data for frequency distributions for nucleosomes N35/112 by the proximity ratios (EPR) in the absence or in the presence of Nhp6 and FACT.

**File name:** Supplementary Data 3

**Description:** Fractions of closed ( $90^\circ$ ) complexes in FACT:Nhp6:nucleosome and Nhp6:nucleosome complexes.
